# Supplementary material
Source: PubMed Central journal article supplement (PMC3341413)

## Supplementary Appendix

This appendix has been provided by the authors to give readers additional information about their work.

Supplement to: Cooper AL, Trivedi AN. Fitness memberships and favorable selection in Medicare Advantage plans. *N Engl J Med* 2012;366:150-7.

## Supplementary Appendix

**This appendix has been provided by the authors to give readers additional information about their work.**

Supplement to: Cooper AL and Trivedi AT. Fitness Memberships and Favorable Selection in Medicare Advantage Plans.

### Contents

|                                                                                                                                                                        |     |
|------------------------------------------------------------------------------------------------------------------------------------------------------------------------|-----|
| Supplemental Table. Organizational Characteristics of Medicare Advantage Plans Adding Fitness Benefits and Control Medicare Advantage Plans.....                       | 1   |
| Supplemental Figure 1. Number of Continuously Participating Medicare Advantage Plans Offering a Fitness Benefit, 2002-2008.....                                        | 2   |
| Supplemental Figure 2. Difference-in-Differences Estimates for Self-Reported Health in Case Plans as Compared with Control Plans, Adjusted for Age, Sex, and Year..... | 3-5 |
| <i>Panel A.</i> Difference-in-Differences Estimates of General Health for Each Matched Case-Control Pair.....                                                          | 3   |
| <i>Panel B.</i> Difference-in-Differences Estimates of Limitation in Moderate Activities for Each Matched Case-Control Pair.....                                       | 4   |
| <i>Panel C.</i> Difference-in-Differences Estimates of Difficulty Walking for Each Matched Case-Control Pair.....                                                      | 5   |

**Supplemental Table. Organizational Characteristics of Medicare Advantage Plans Adding Fitness Benefits and Control Medicare Advantage Plans.**

|                                   | <b>Case Plans that Added Fitness Benefits</b> | <b>Control Plans</b> |
|-----------------------------------|-----------------------------------------------|----------------------|
| <b>N</b>                          | 11                                            | 11                   |
| <b>Census Region, n</b>           |                                               |                      |
| <b>Northeast</b>                  | 4                                             | 4                    |
| <b>Midwest</b>                    | 2                                             | 2                    |
| <b>South</b>                      | 4                                             | 4                    |
| <b>West</b>                       | 1                                             | 1                    |
| <b>Model Type, n</b>              |                                               |                      |
| <b>Staff/Group</b>                | 2                                             | 0                    |
| <b>IPA/Network/Mixed</b>          | 9                                             | 11                   |
| <b>Tax Status, n</b>              |                                               |                      |
| <b>For-profit</b>                 | 9                                             | 9                    |
| <b>Not for profit</b>             | 2                                             | 2                    |
| <b>Median Number of Enrollees</b> | 31,540                                        | 18,241               |
| <b>Median Years of Operation</b>  | 11                                            | 10.6                 |

**Supplemental Figure 1. Number of Continuously Participating Medicare Advantage Plans Offering a Fitness Benefit, 2002-2008.**

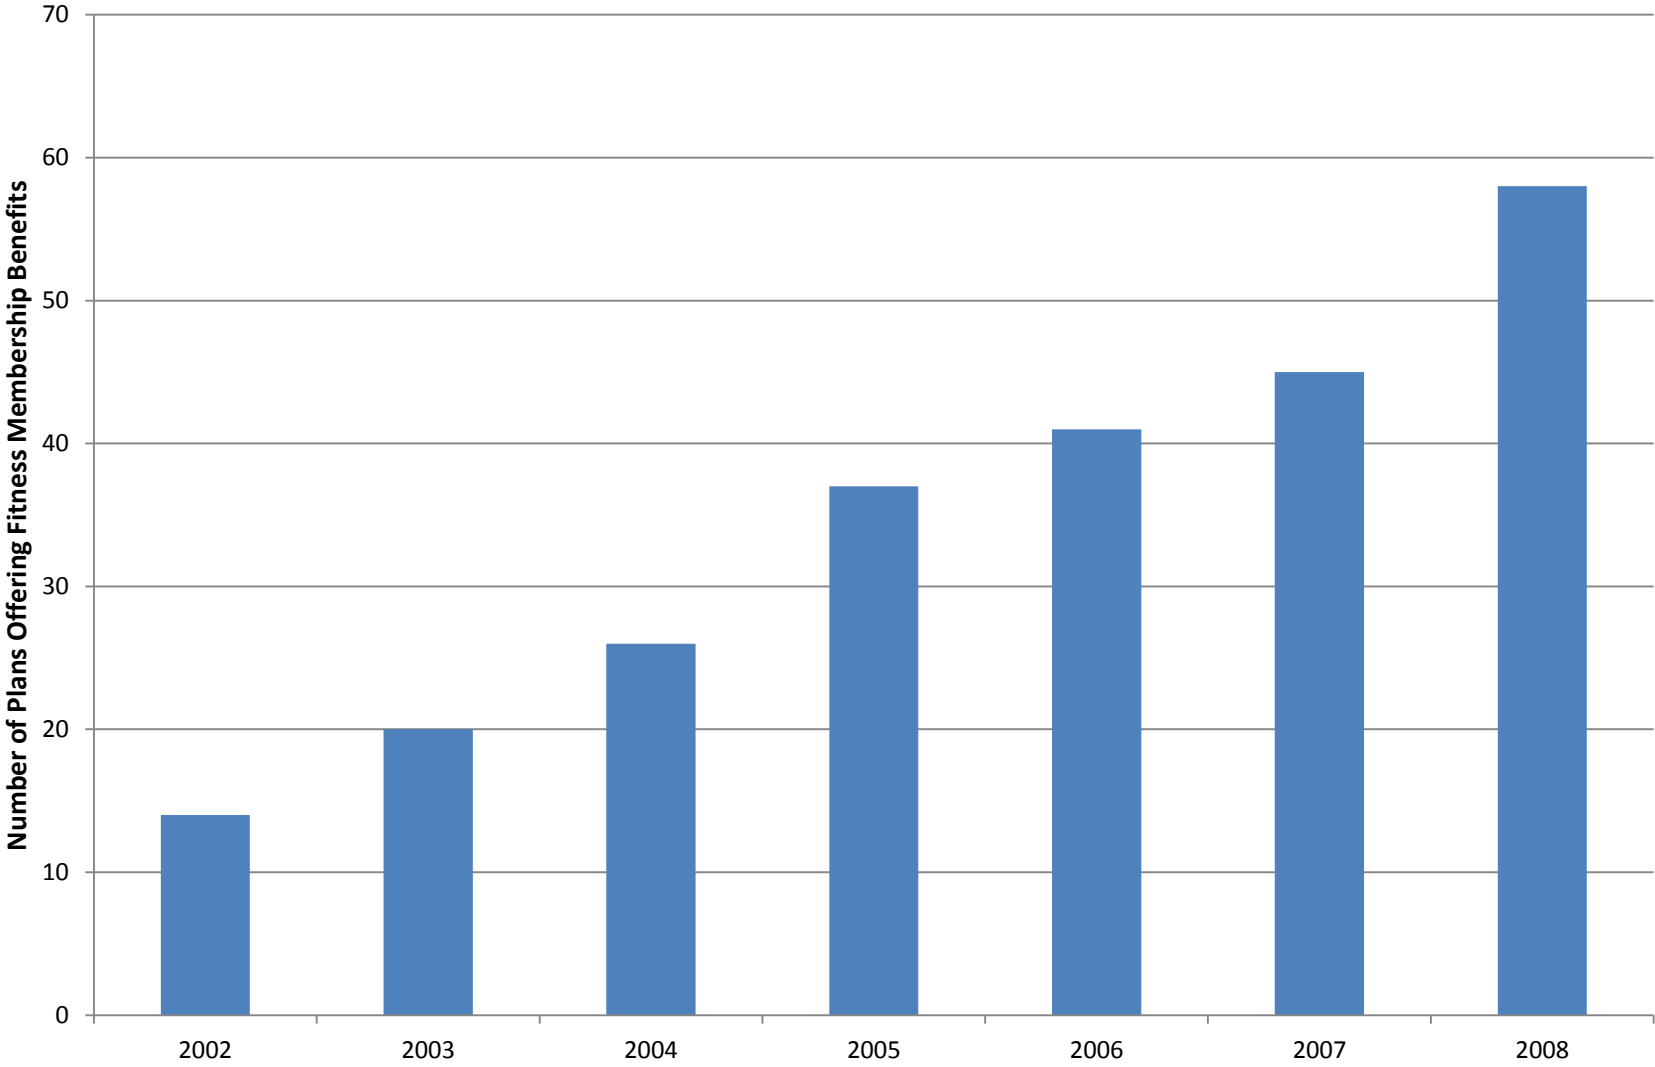

**Supplemental Figure 2. Difference-in-Differences Estimates for Self-Reported Health in Case Plans as Compared with Control Plans, Adjusted for Age, Sex, and Year.**

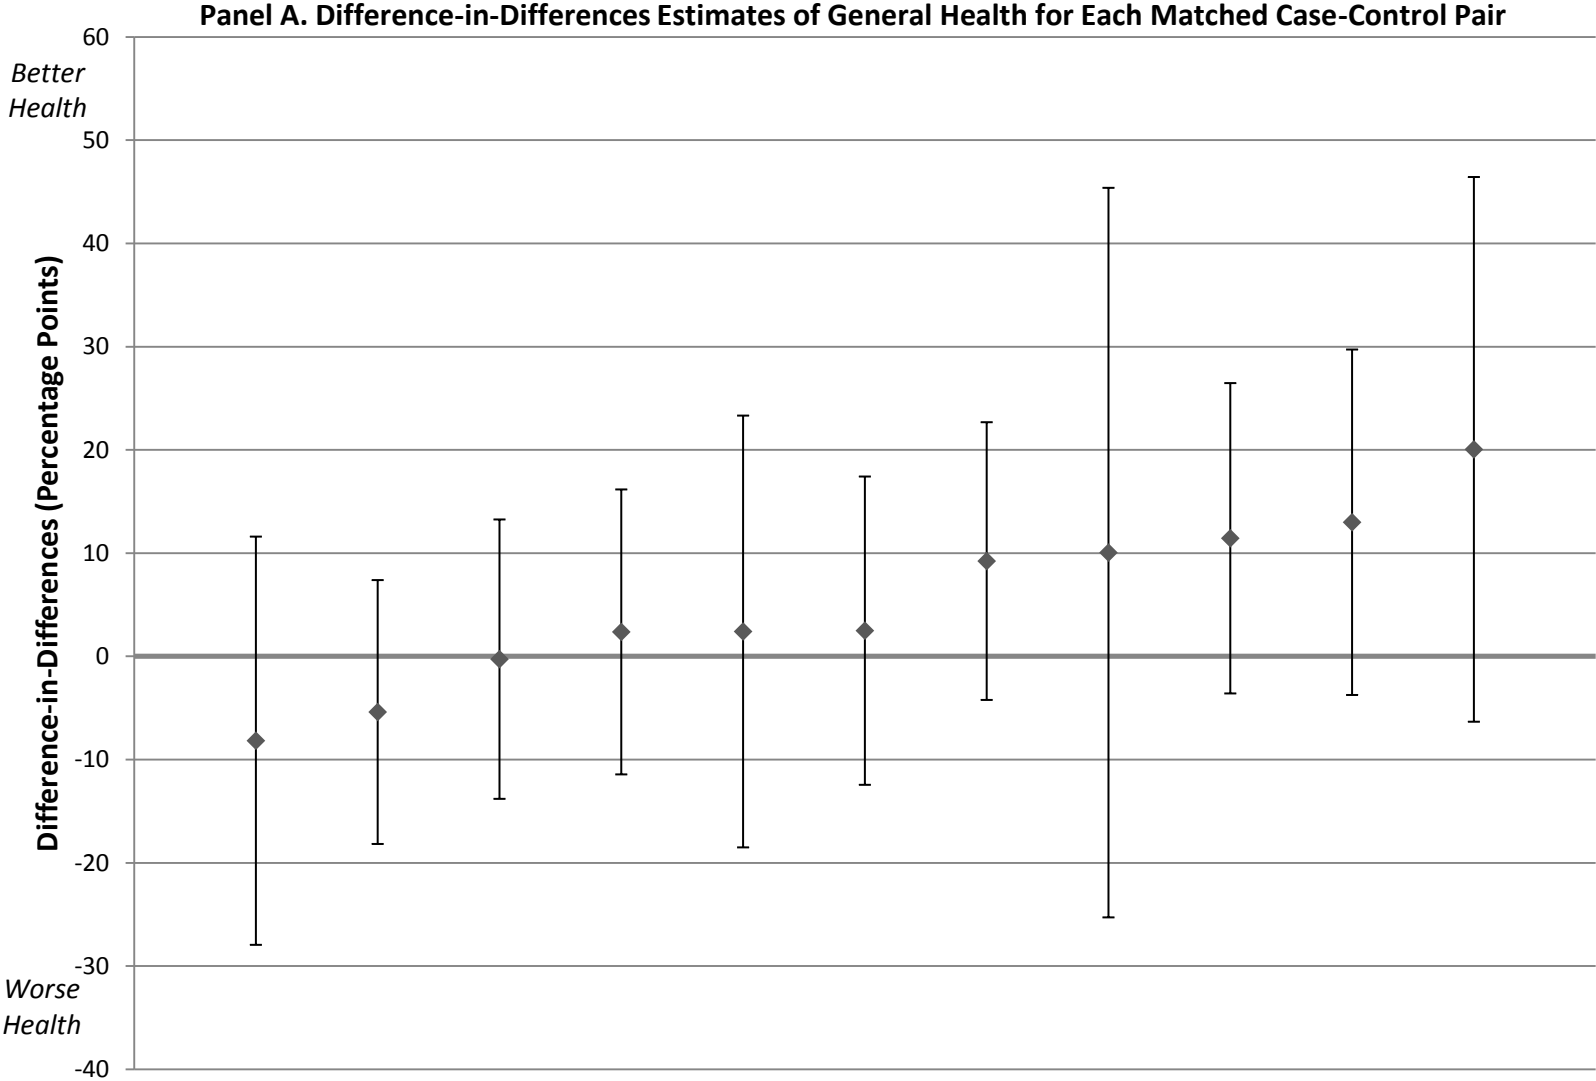

**Panel B. Difference-in-Differences Estimates of Limitation in Moderate Activities for Each Matched Case-Control**

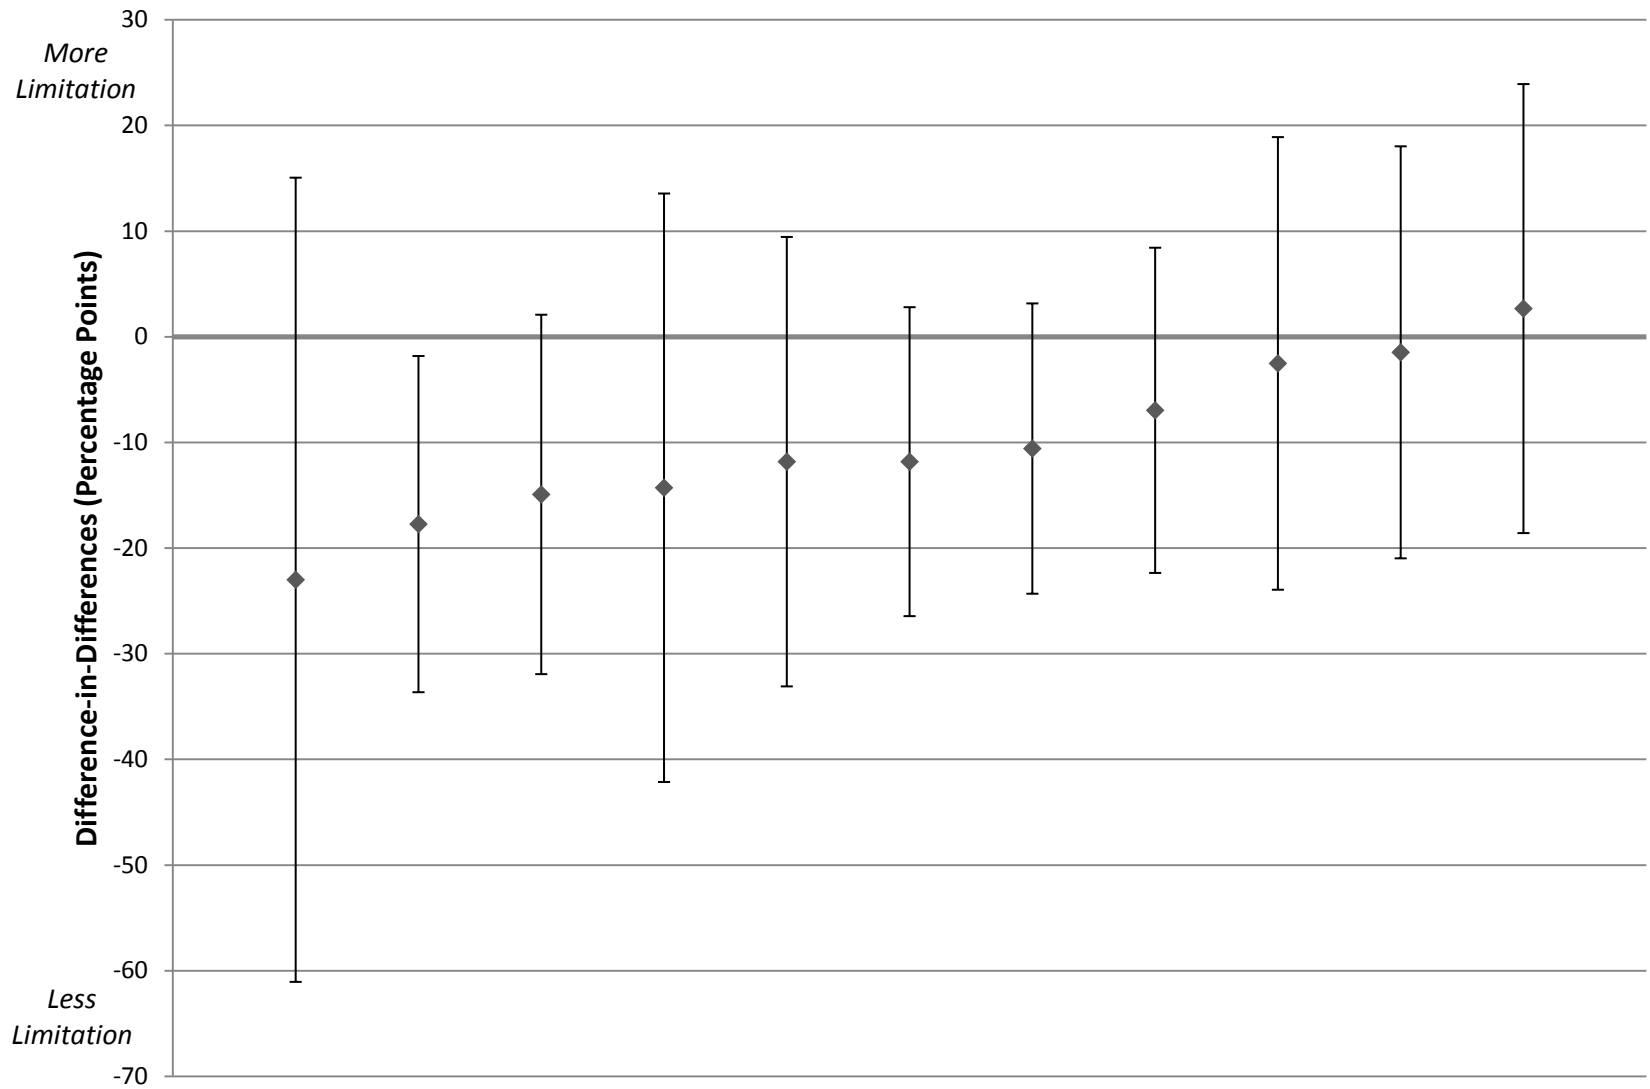

Panel C. Difference-in-Differences Estimates of Difficulty Walking for Each Matched Case-Control

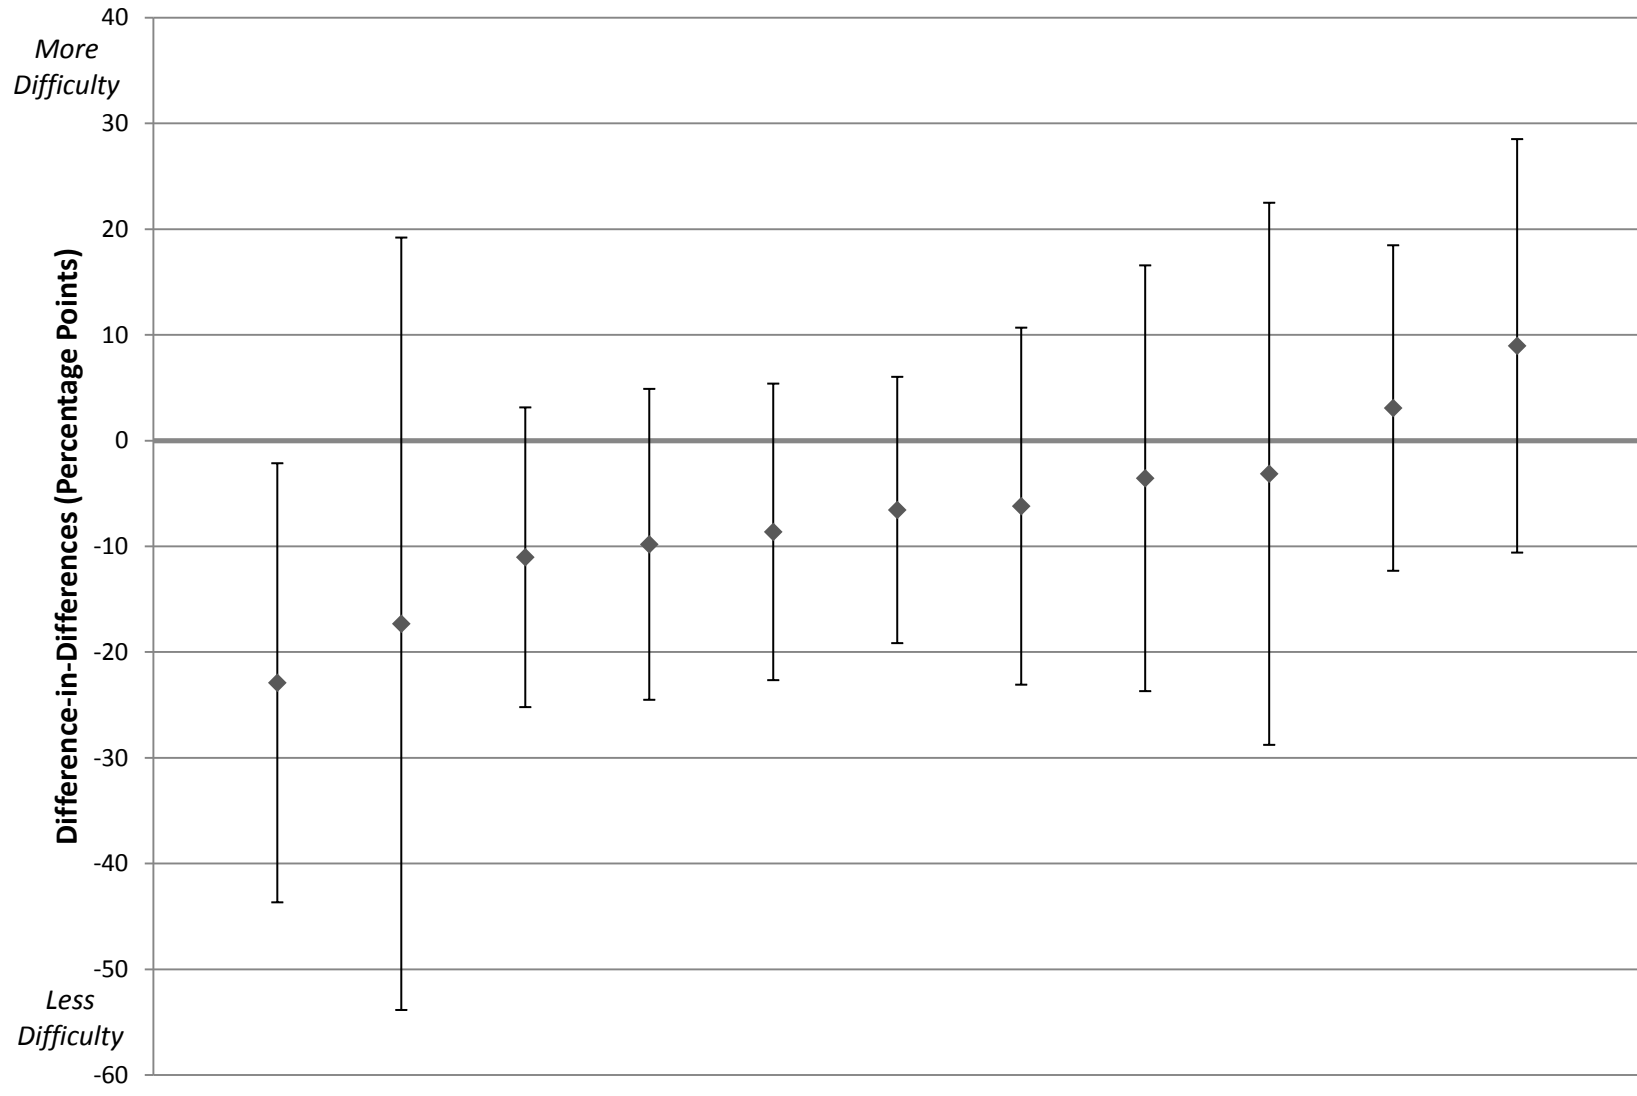

Supplement: NIHMS356977-supplement-Supplement1.pdf [file NIHMS356977-supplement-Supplement1.pdf]
